# Supplementary material for: Tuning the morphology and the structure of hierarchical meso–macroporous silica by dual templating with micelles and solid lipid nanoparticles (SLN)
Source: Royal Society of Chemistry journal article supplement (doi:10.1039/c2jm35004a), 2012-01-01
Supplement: c2jm35004a.pdf [file c2jm35004a.pdf]

## SUPPORTING INFORMATION

### Tuning the morphology and the structure of hierarchical meso-macroporous silica by dual templating with micelles and solid lipid nanoparticles (SLN)

Renan Ravetti-Duran, Jean-Luc Blin, Marie-José Stébé, Christophe Castel, Andreea Pasc

**Table SI1. SLN size determined by DLS measurements with various surfactants as a function of surfactant concentration**

|                    | Surfactant (%) | NHP % | SLN sizes (nm) |
|--------------------|----------------|-------|----------------|
| <b>S-T20-10a</b>   | Tween 20 (1.5) | 10    | 250-400        |
| <b>S-T20-10b</b>   | Tween 20 (3)   | 10    | 200-300        |
| <b>S-T20-1a</b>    | Tween 20 (1.5) | 1     | 280-400        |
| <b>S-T20-1b</b>    | Tween 20 (3)   | 1     | 230-380        |
| <b>S-T20-0.1a</b>  | Tween 20 (1.5) | 0.1   | 250-400        |
| <b>S-T20-0.1b</b>  | Tween 20 (3)   | 0.1   | 200-390        |
| <b>S-T40-10a</b>   | Tween 40 (1.6) | 10    | 260-380        |
| <b>S-T40-10b</b>   | Tween 40 (3)   | 10    | 280-400        |
| <b>S-T40-1a</b>    | Tween 40 (1.6) | 1     | 200-400        |
| <b>S-T40-1b</b>    | Tween 40 (3)   | 1     | 200-300        |
| <b>S-T40-0.1a</b>  | Tween 40 (1.6) | 0.1   | 280-400        |
| <b>S-T40-0.1b</b>  | Tween 40 (3)   | 0.1   | 260-390        |
| <b>S-P123-10a</b>  | P123 (1.7)     | 10    | 220-300        |
| <b>S-P123-10b</b>  | P123 (3)       | 10    | 100-250        |
| <b>S-P123-10c</b>  | P123 (6.9)     | 10    | 180-200        |
| <b>S-P123-1a</b>   | P123 (1.7)     | 1     | 200-350        |
| <b>S-P123-1b</b>   | P123 (3)       | 1     | 150-300        |
| <b>S-P123-0.1a</b> | P123 (1.7)     | 0.1   | 120-280        |
| <b>S-P123-0.1b</b> | P123 (3)       | 0.19  | 150-400        |

### Materials with TWEEN 20 as porogen

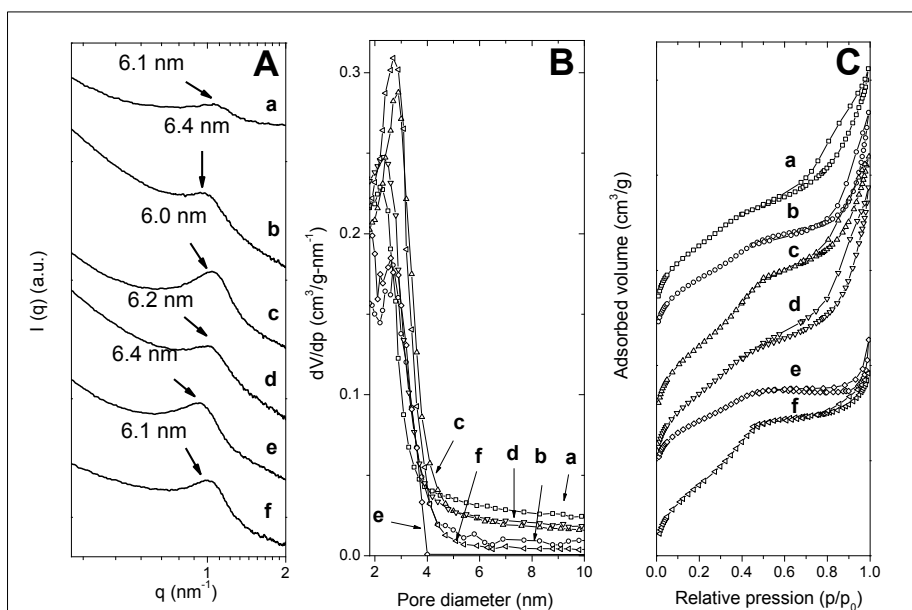

Figure S11. (A) SAXS patterns, (B) pore diameter and (C) nitrogen adsorption-desorption isotherm of the meso-macroporous material formed from SLN dispersions in micellar solution of Tween 20 with 10 wt% of NHP at different surfactant concentrations and surfactant/silica source molar ratio R: (a) 1.5 wt%, R=0.04 ; (b) 1.5 wt%, R=0.07 ; (c) 3.0 wt%, R=0.07 ; (d) 3.0 wt%, R=0.10 ; (e) 3.0 wt%, 0.30 ; (f) 5.0 wt%, R=0.07.

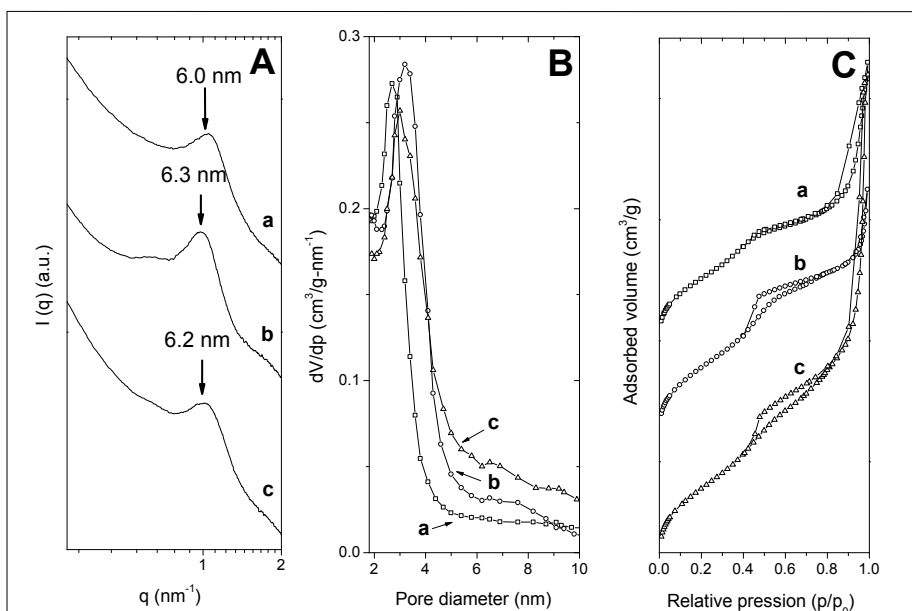

Figure S12. (A) SAXS patterns, (B) pore diameter and (C) nitrogen adsorption-desorption of the meso-macroporous material formed from SLN dispersions in micellar solution of Tween 20 with 0.1 wt% NHP at different surfactant concentrations and ratio R : (a) 1.5 wt%, R=0.04 ; (b) 1.5 wt%, R=0.07 ; (c) 3.0 wt%, R=0.07.

### Materials with TWEEN 40 as porogen

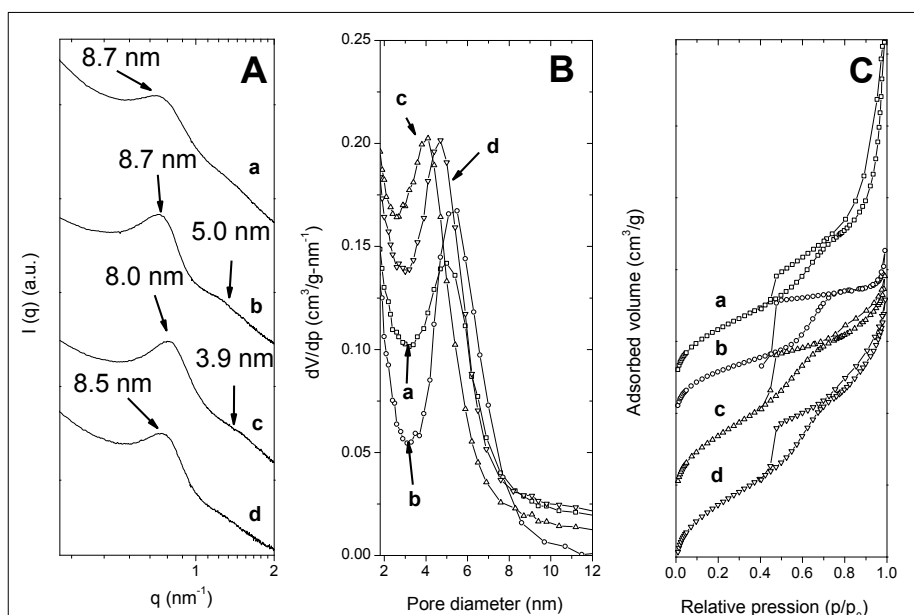

Figure SI3. (A) SAXS patterns, (B) pore diameter and (C) nitrogen adsorption-desorption of the meso-macroporous material formed from SLN dispersions in micellar solution of Tween 40 with 10 wt% NHP at different surfactant concentrations and ratio R : (a) 1.6 wt%, R=0.04 ; (b) 1.6 wt%, R=0.07 ;(c) 3.0 wt%, R=0.04;(c) 3.0 wt%, R=0.04.

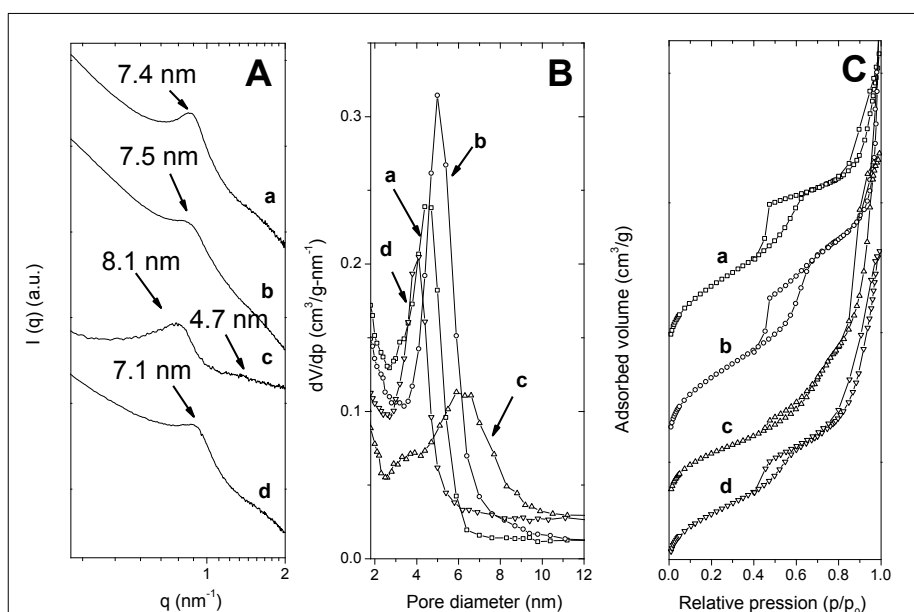

Figure SI4. (A) SAXS patterns, (B) pore diameter and (C) nitrogen adsorption-desorption of the meso-macroporous material formed from SLN dispersions in micellar solution of Tween 40 with 0.1 wt% NHP at different surfactant concentrations and ratio R : (a) 1.6 wt%, R=0.04 ; (b) 1.6 wt%, R=0.07 ;(c) 1.6 wt%, R=0.10;(c) 3.0 wt%, R=0.04.

### Materials with P123 as porogen

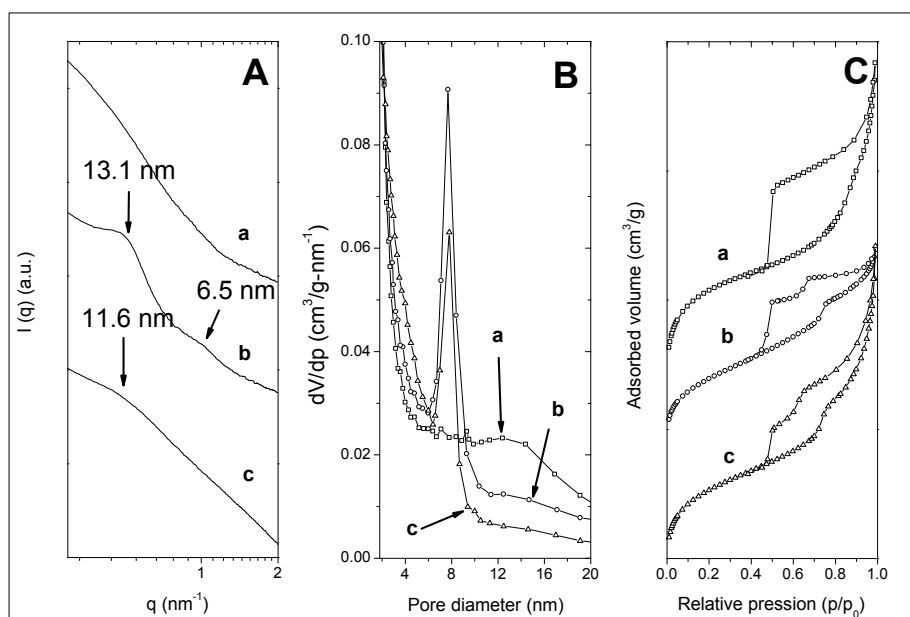

Figure SI5. (A) SAXS patterns, (B) pore diameter and (C) nitrogen adsorption-desorption of the meso-macroporous material formed from SLN dispersions in micellar solution of P123 with 10 wt% NHP at different surfactant concentrations and ratio R : (a) 1.7 wt%, R=0.08 ; (b) 3.1 wt%, R=0.08 ; (c) 6.9 wt%, R=0.36.

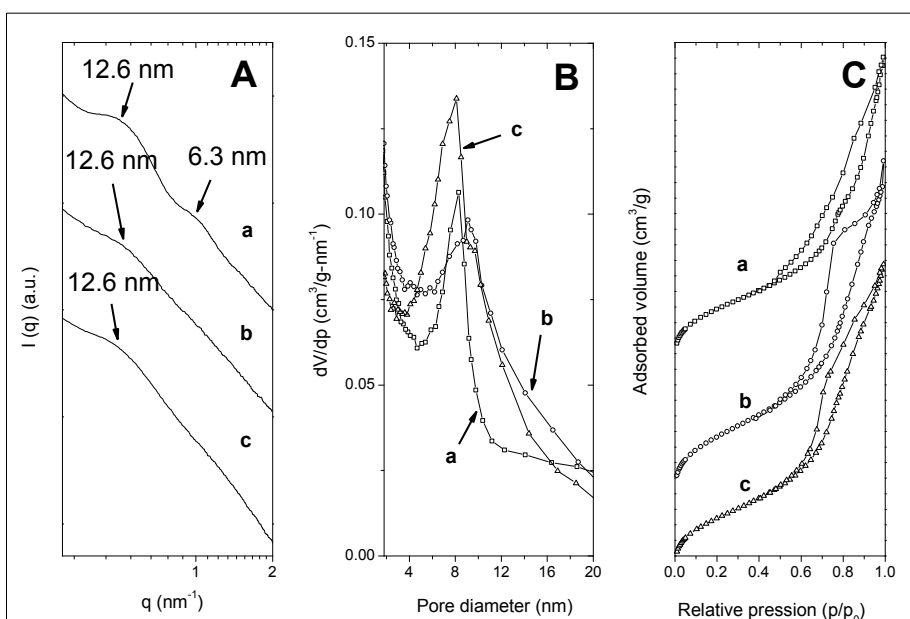

Figure SI6. (A) SAXS patterns, (B) pore diameter and (C) nitrogen adsorption-desorption of the meso-macroporous material formed from SLN dispersions in micellar solution of P123 with 1 wt% NHP at different surfactant concentrations and ratio R : (a) 1.7 wt%, R=0.08 ; (b) 1.7 wt%, R=0.19 ; (c) 6.9 wt%, R=0.08.

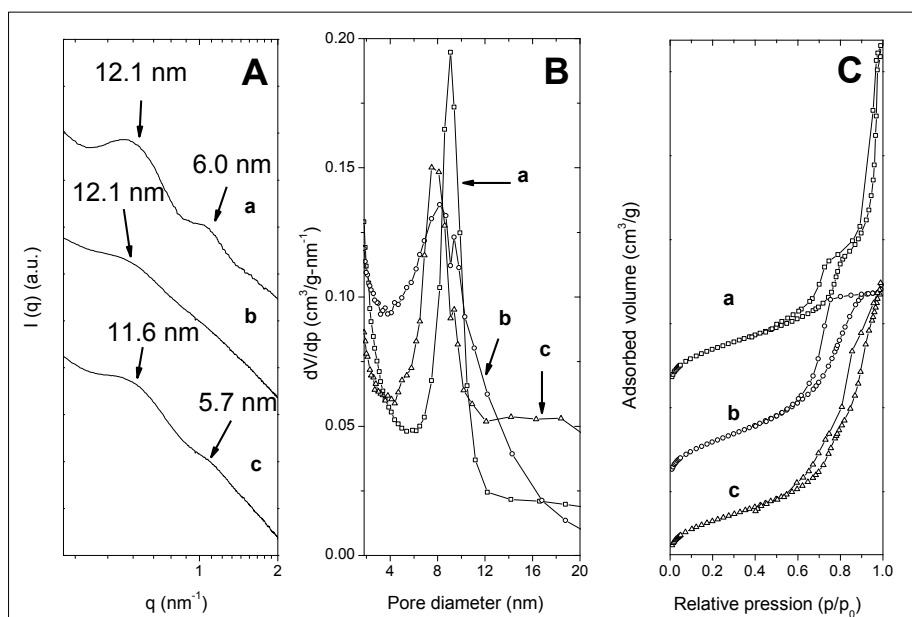

Figure SI7. (A) SAXS patterns, (B) pore diameter and (C) nitrogen adsorption-desorption of the meso-macroporous material formed from SLN dispersions in micellar solution of P123 with 0,1 wt% NHP at different surfactant concentrations and ratio R : (a) 1.7 wt%, R=0.08 ; (b) 1.7 wt%, R=0.19 ; (c) 3.1 wt%, R=0.08.
